# Supplementary material for: Transmembrane helices mediate the formation of a stable ternary complex of b5R, cyt b5, and SCD1
Source: PubMed Central journal article supplement (PMC9468158; doi:10.1038/s42003-022-03882-z), 2022-09-12
Supplement: 42003_2022_3882_MOESM1_ESM.pdf [file 42003_2022_3882_MOESM1_ESM.pdf]

## Supplementary Information

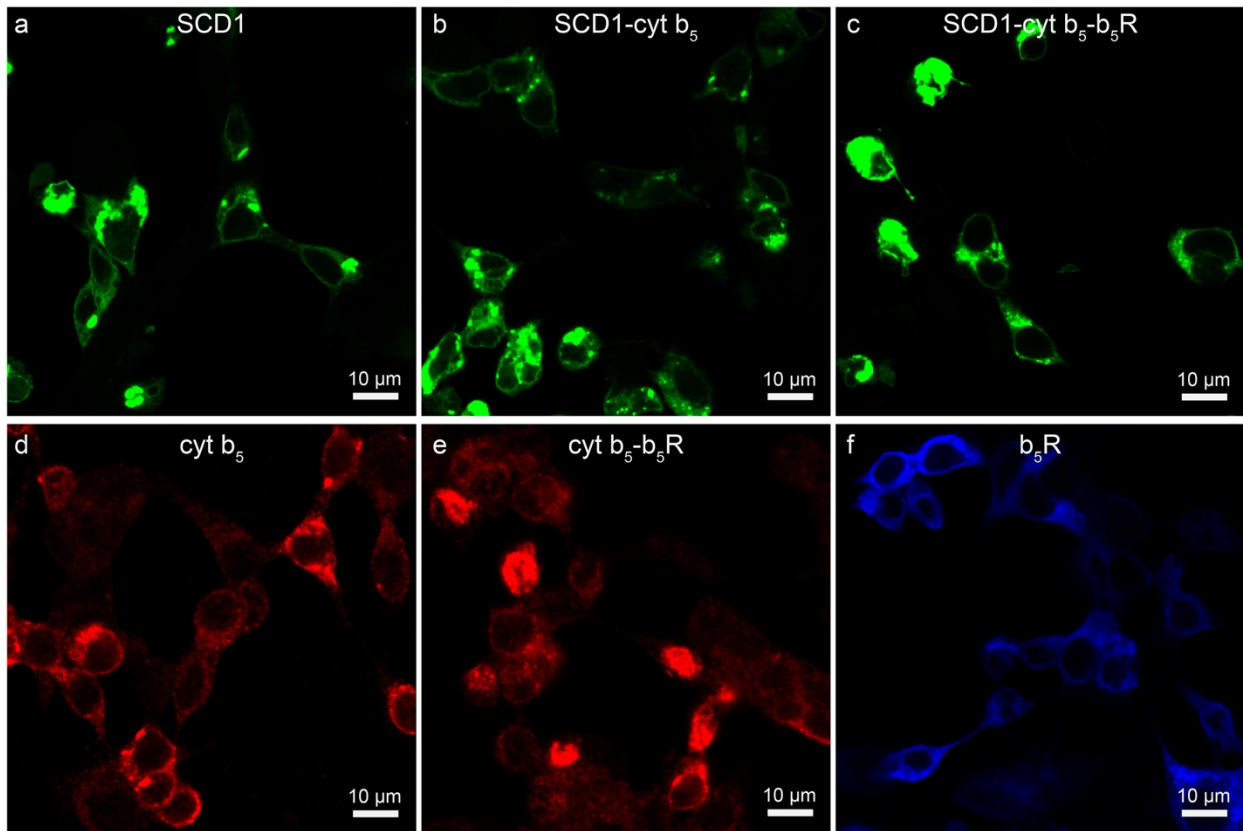

**Supplementary Figure 1.** Expression and subcellular distribution of SCD1, cyt b<sub>5</sub>, b<sub>5</sub>R, and their binary and ternary fusions. Confocal microscopy images of HEK293 cells expressing **a**, SCD1-GFP; **b**, SCD1-cyt b<sub>5</sub>-GFP; **c**, GFP-SCD1-cyt b<sub>5</sub>-b<sub>5</sub>R; **d**, Myc-cyt b<sub>5</sub>; **e**, Myc-cyt b<sub>5</sub>-b<sub>5</sub>R; and **f**, HA-b<sub>5</sub>R.

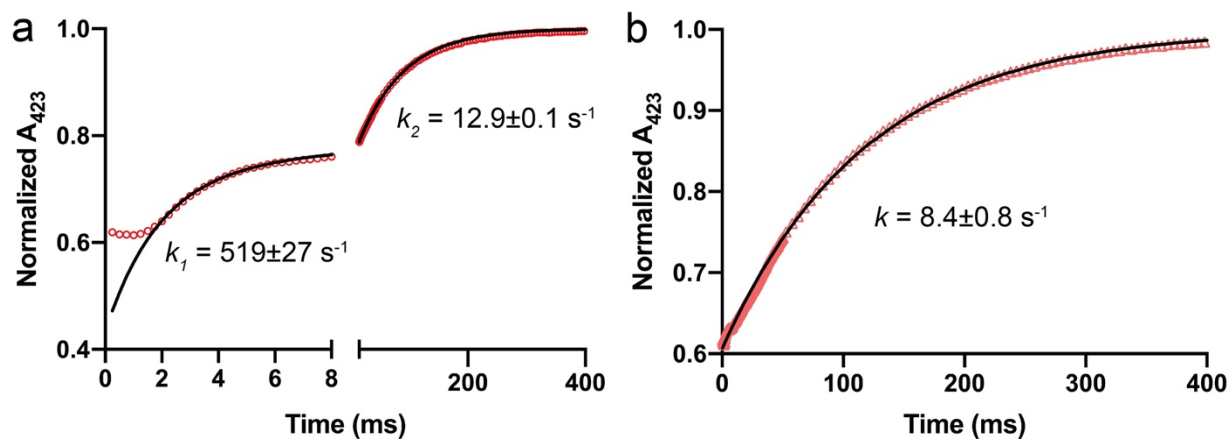

**Supplementary Figure 2.** Representative time courses of electron transfer between  $b_5R$  and cyt  $b_5$  in **a**, cyt  $b_5$ - $b_5R$  complex; and **b**, individual cyt  $b_5$  and  $b_5R$ . In both **a** and **b**, the reaction buffer containing 150 mM NaCl was used. The reduction of cyt  $b_5$  was followed at 423 nm. The time course is biphasic for cyt  $b_5$ - $b_5R$  complex with a fast phase ( $k_1$ ) and a slow phase ( $k_2$ ), while monophasic ( $k$ ) for the individual cyt  $b_5$  and  $b_5R$ . Red dots represent experimental data and black curves the 1-exponential fit. Rate constants are denoted as mean  $\pm$  SEM of three independent repeats.

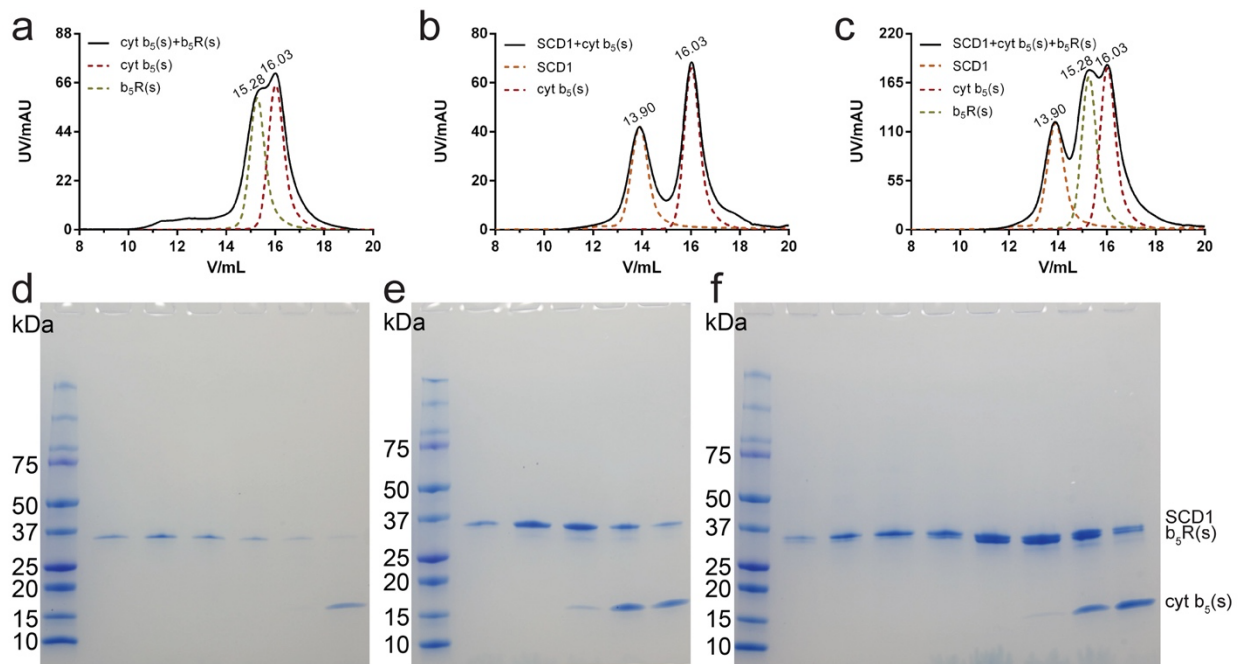

**Supplementary Figure 3.** SCD1, soluble cytochrome  $b_5$ , and  $b_5$ R cannot form a stable complex in SEC. **a** and **d**, SEC profile of a mixture of soluble cytochrome  $b_5$  and  $b_5$ R, and SDS-PAGE gel image of fractions within the elution volume of 14 – 17 mL. **b** and **e**, SEC profile of a mixture of SCD1 and soluble cytochrome  $b_5$ , and SDS-PAGE gel image of fractions within the elution volume of 14 – 17 mL. **c** and **f**, SEC profile of a mixture of SCD1, soluble cytochrome  $b_5$  and  $b_5$ R, and SDS-PAGE gel image of fractions within the elution volume of 13 – 17 mL.

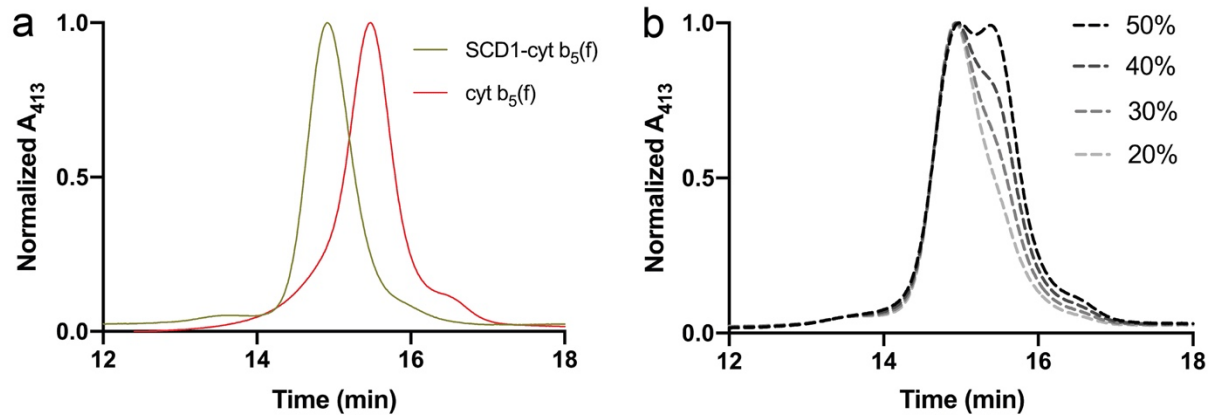

**Supplementary Figure 4.** **a**, SEC profiles of SCD1-cyt  $b_5$  (yellow) complex and full-length cyt  $b_5$  (red) in an HPLC system monitoring absorbance at 413 nm. **b**, Simulated profiles of a partially dissociated complex based on profiles in **a**. Percentages represent the molar ratio of dissociated cyt  $b_5$  to all heme-containing proteins, including the SCD1-cyt  $b_5$  complex and individual cyt  $b_5$ .

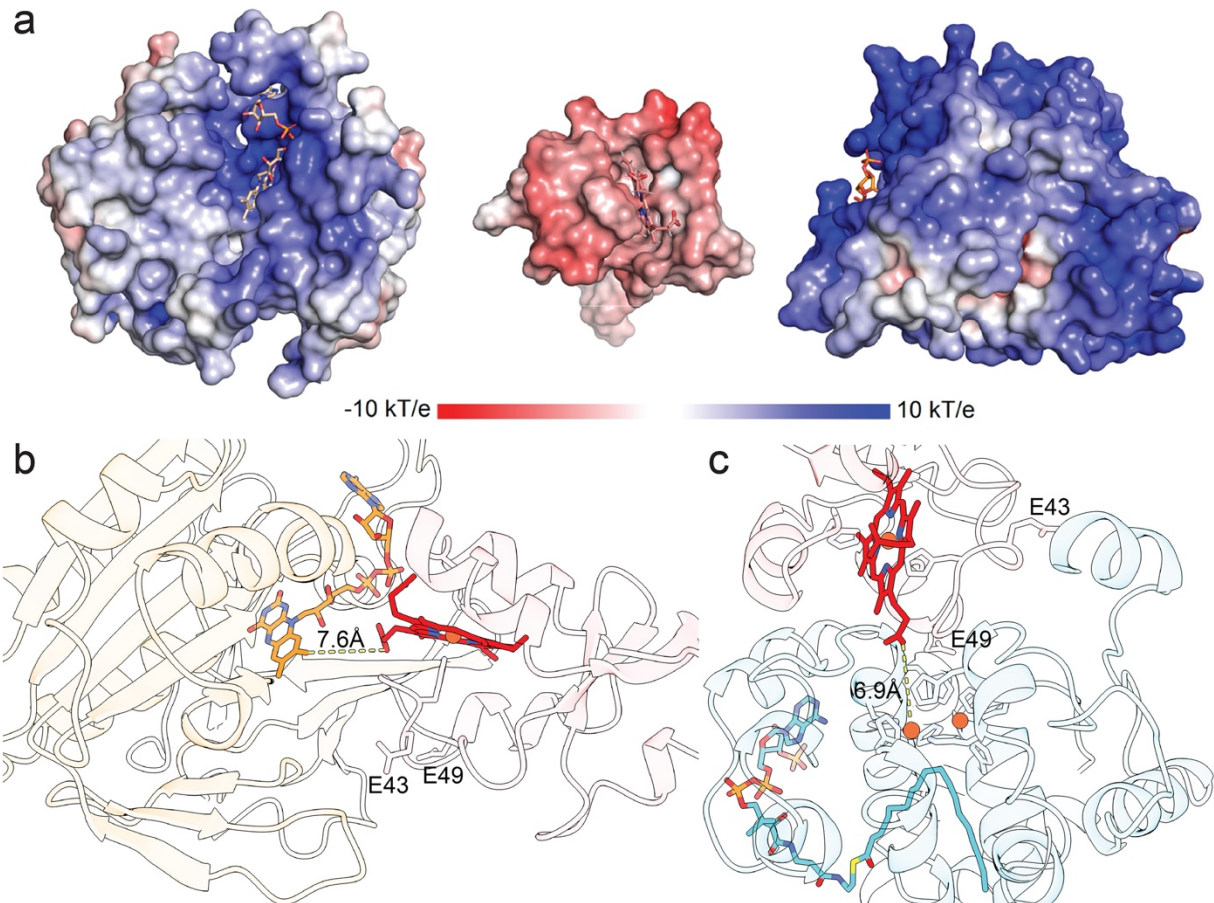

**Supplementary Figure 5.** **a**, Electrostatic potential of the soluble domains of b<sub>5</sub>R (left), cyt b<sub>5</sub> (middle), and SCD1 (right). The binding interfaces are shown as surfaces colored from red to blue to represent potential from  $-10$  kT/e to  $+10$  kT/e. The prosthetic groups and ligands are shown as sticks. The docking model of: **b**, the soluble domains of cyt b<sub>5</sub> (red) and b<sub>5</sub>R (orange); **c**, SCD1 (cyan) and the soluble domain cyt b<sub>5</sub> (red). The FAD in b<sub>5</sub>R, heme in cyt b<sub>5</sub>, and diiron center and acyl-CoA in SCD1 are highlighted. The closest distances between redox centers in the models are labeled. Two residues (E43 and E49) of cyt b<sub>5</sub> on the binding interfaces in both cyt b<sub>5</sub>-b<sub>5</sub>R and SCD1-cyt b<sub>5</sub> complex are shown as sidechain sticks.

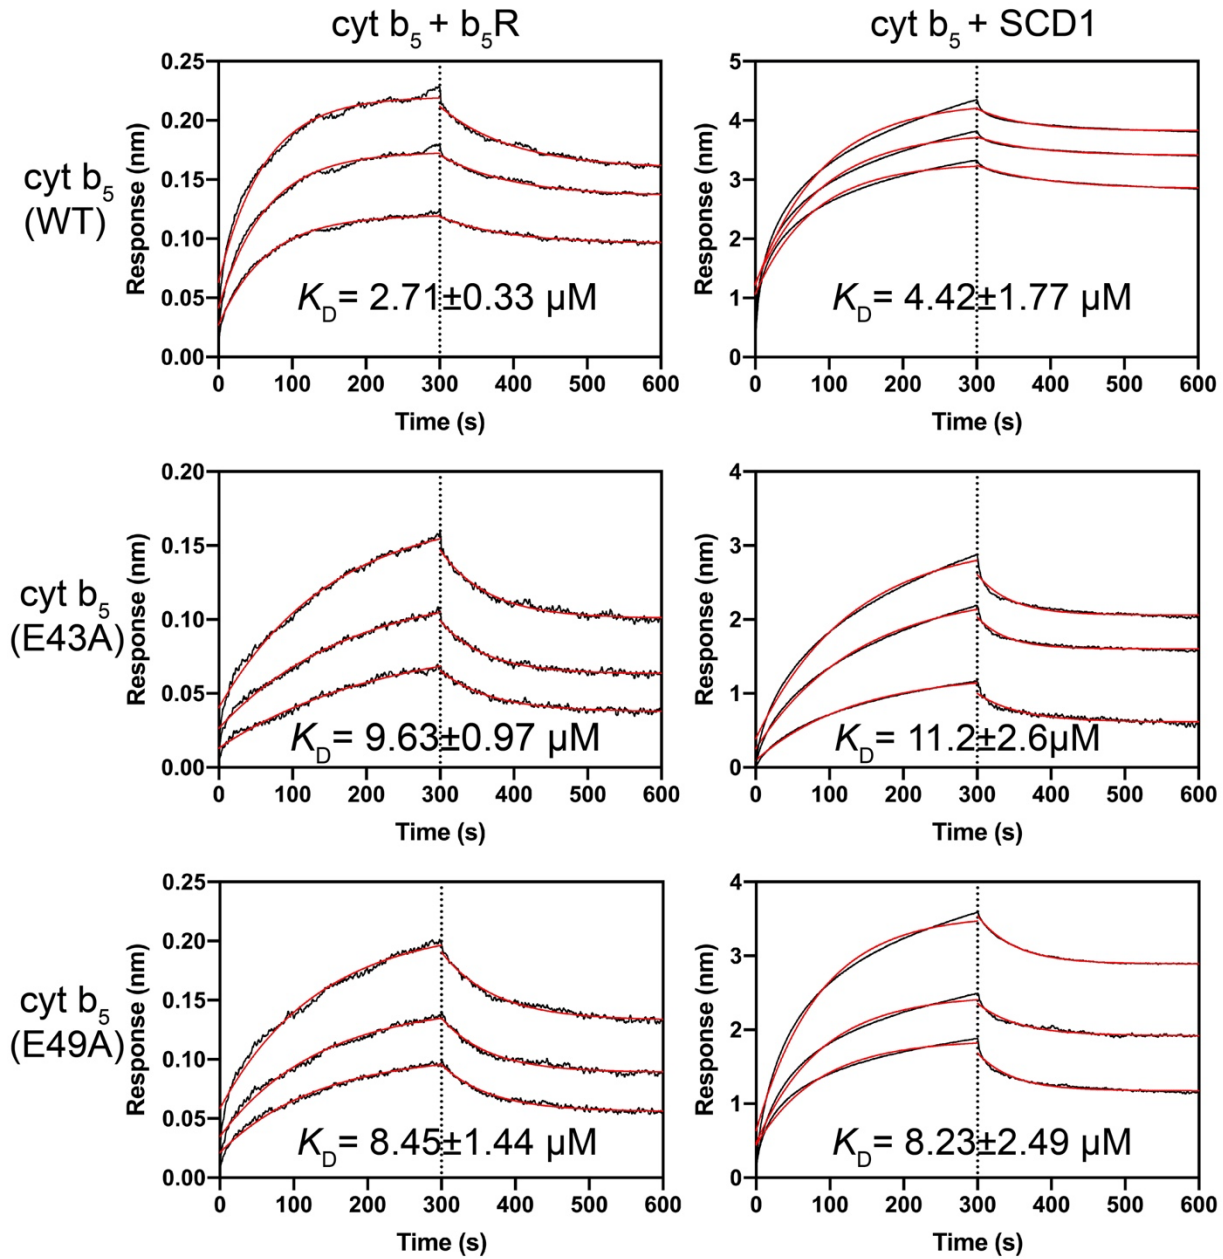

**Supplementary Figure 6.** Binding of wild-type (WT) and surface mutants (E43A and E49A) of cyt  $b_5$  to  $b_5R$  (left panel) or SCD1 (right panel) measured in Octet BLI.  $K_D$  values were calculated as described in Methods.



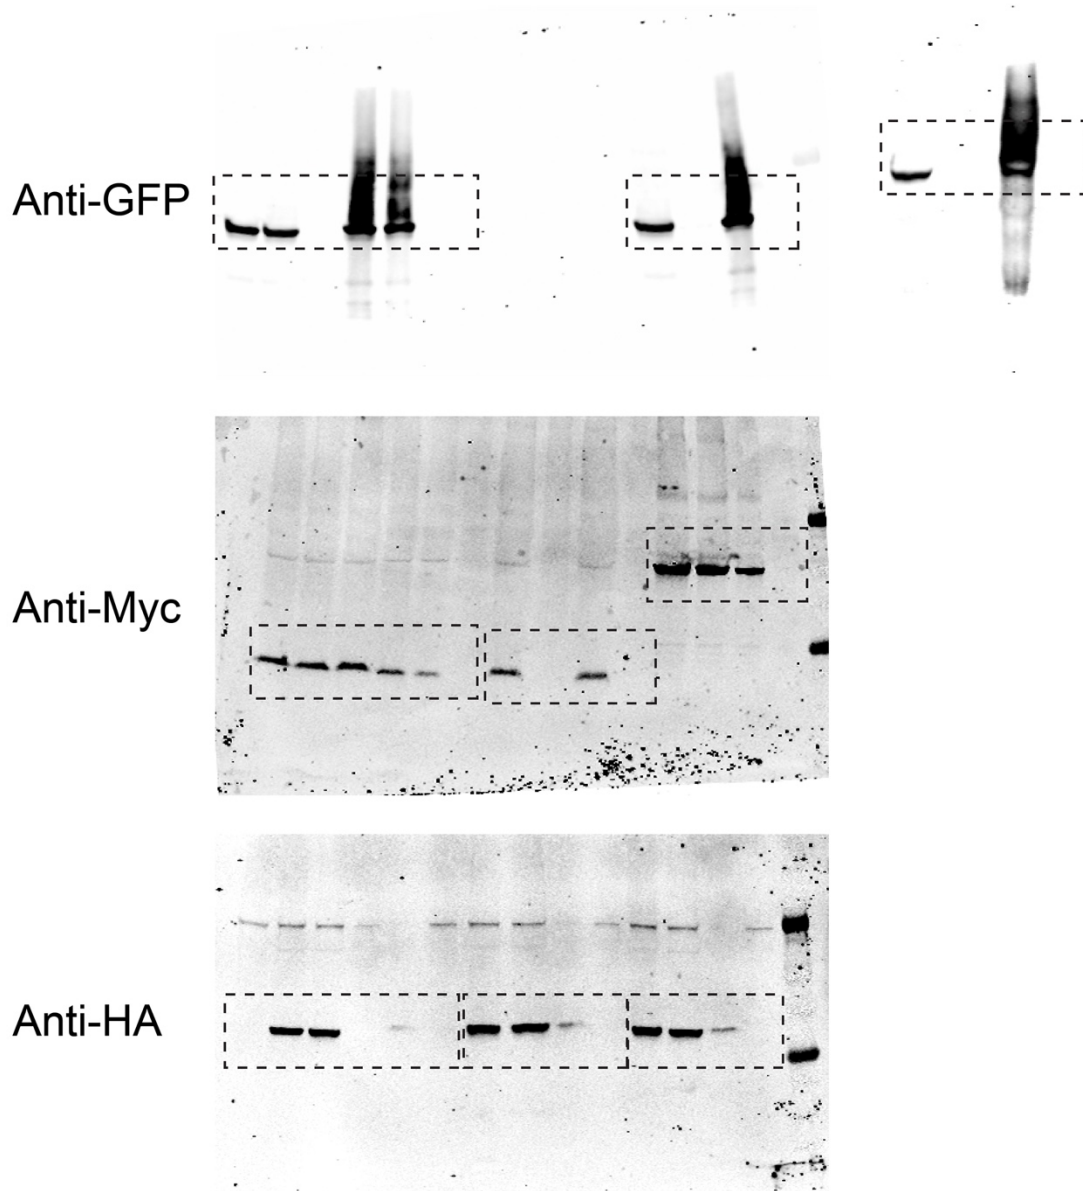

**Supplementary Figure 7.** Western blot images shown in **Figure 2**. Black dotted rectangles indicate regions of interest.
