# Supplementary material for: Transmembrane helices mediate the formation of a stable ternary complex of b5R, cyt b5, and SCD1
Source: PubMed Central journal article supplement (PMC9468158; doi:10.1038/s42003-022-03882-z), 2022-09-12
Supplement: 42003_2022_3882_MOESM2_ESM.pdf [file 42003_2022_3882_MOESM2_ESM.pdf]

## Description of Additional Supplementary Files

**File name:** Supplementary Data 1

**Description:** The source data behind the Figure 3–5 in the paper.
